# Supplementary material
Source: PubMed Central journal article supplement (PMC2755540)
Supplement: NIHMS136892-supplement-supplement.pdf [file NIHMS136892-supplement-supplement.pdf]

| Gene Name | Description                                                          | Ref. Sequence | Fold Change |         |
|-----------|----------------------------------------------------------------------|---------------|-------------|---------|
|           |                                                                      |               | SK-OV-3     | OVCAR-3 |
| ABCF1     | ATP-binding cassette, sub-family F (GCN20), member 1                 | NM_001090     | -           | -       |
| BCL6      | B-cell CLL/lymphoma 6 (zinc finger protein 51)                       | NM_001706     | -           | -       |
| C3        | Complement component 3                                               | NM_000064     | -           | -1.54   |
| C4A       | Complement component 4A (Rodgers blood group)                        | NM_007293     | -           | -       |
| C5        | Complement component 5                                               | NM_001735     | 13.74       | -       |
| CCL1      | Chemokine (C-C motif) ligand 1                                       | NM_002981     | -           | -       |
| CCL11     | Chemokine (C-C motif) ligand 11                                      | NM_002986     | -           | -       |
| CCL13     | Chemokine (C-C motif) ligand 13                                      | NM_005408     | -           | -       |
| CCL15     | Chemokine (C-C motif) ligand 15                                      | NM_032965     | -           | -       |
| CCL16     | Chemokine (C-C motif) ligand 16                                      | NM_004590     | -           | -       |
| CCL17     | Chemokine (C-C motif) ligand 17                                      | NM_002987     | -           | -       |
| CCL18     | Chemokine (C-C motif) ligand 18 (pulmonary and activation-regulated) | NM_002988     | -           | -       |
| CCL19     | Chemokine (C-C motif) ligand 19                                      | NM_006274     | -           | 2.42    |
| CCL2      | Chemokine (C-C motif) ligand 2                                       | NM_002982     | -           | -2.23   |
| CCL20     | Chemokine (C-C motif) ligand 20                                      | NM_004591     | -           | -       |
| CCL21     | Chemokine (C-C motif) ligand 21                                      | NM_002989     | -           | -       |
| CCL23     | Chemokine (C-C motif) ligand 23                                      | NM_005064     | -           | -       |
| CCL24     | Chemokine (C-C motif) ligand 24                                      | NM_002991     | -           | -       |
| CCL25     | Chemokine (C-C motif) ligand 25                                      | NM_005624     | -1.49       | 2.59    |
| CCL26     | Chemokine (C-C motif) ligand 26                                      | NM_006072     | -           | -       |
| CCL3      | Chemokine (C-C motif) ligand 3                                       | NM_002983     | -           | -       |
| CCL4      | Chemokine (C-C motif) ligand 4                                       | NM_002984     | -           | -       |
| CCL5      | Chemokine (C-C motif) ligand 5                                       | NM_002985     | -           | -1.54   |
| CCL7      | Chemokine (C-C motif) ligand 7                                       | NM_006273     | -           | -       |
| CCL8      | Chemokine (C-C motif) ligand 8                                       | NM_005623     | -           | -       |
| CCR1      | Chemokine (C-C motif) receptor 1                                     | NM_001295     | -           | 1.60    |
| CCR2      | Chemokine (C-C motif) receptor 2                                     | NM_000648     | -           | -       |
| CCR3      | Chemokine (C-C motif) receptor 3                                     | NM_001837     | -           | 1.83    |

|         |                                                                                |           |       |       |
|---------|--------------------------------------------------------------------------------|-----------|-------|-------|
| CCR4    | Chemokine (C-C motif) receptor 4                                               | NM_005508 | -     | 1.60  |
| CCR5    | Chemokine (C-C motif) receptor 5                                               | NM_000579 | -     | -     |
| CCR6    | Chemokine (C-C motif) receptor 6                                               | NM_004367 | -     | 2.98  |
| CCR7    | Chemokine (C-C motif) receptor 7                                               | NM_001838 | -     | -     |
| CCR8    | Chemokine (C-C motif) receptor 8                                               | NM_005201 | -     | 1.49  |
| CCR9    | Chemokine (C-C motif) receptor 9                                               | NM_006641 | 1.51  | -     |
| CEBPB   | CCAAT/enhancer binding protein (C/EBP), beta                                   | NM_005194 | -     | -     |
| CRP     | C-reactive protein, pentraxin-related                                          | NM_000567 | -     | -     |
| CX3CR1  | Chemokine (C-X3-C motif) receptor 1                                            | NM_001337 | -1.54 | -     |
| CXCL1   | Chemokine (C-X-C motif) ligand 1 (melanoma growth stimulating activity, alpha) | NM_001511 | -     | -     |
| CXCL10  | Chemokine (C-X-C motif) ligand 10                                              | NM_001565 | -     | 1.62  |
| CXCL11  | Chemokine (C-X-C motif) ligand 11                                              | NM_005409 | -     | -     |
| CXCL12  | Chemokine (C-X-C motif) ligand 12 (stromal cell-derived factor 1)              | NM_000609 | -     | 1.71  |
| CXCL13  | Chemokine (C-X-C motif) ligand 13 (B-cell chemoattractant)                     | NM_006419 | -     | -     |
| CXCL14  | Chemokine (C-X-C motif) ligand 14                                              | NM_004887 | -     | 1.49  |
| CXCL2   | Chemokine (C-X-C motif) ligand 2                                               | NM_002089 | -     | -     |
| CXCL3   | Chemokine (C-X-C motif) ligand 3                                               | NM_002090 | -1.50 | -4.07 |
| CXCL5   | Chemokine (C-X-C motif) ligand 5                                               | NM_002994 | -     | -     |
| CXCL6   | Chemokine (C-X-C motif) ligand 6 (granulocyte chemotactic protein 2)           | NM_002993 | -     | -     |
| CXCL9   | Chemokine (C-X-C motif) ligand 9                                               | NM_002416 | -     | -     |
| ICEBERG | ICEBERG caspase-1 inhibitor                                                    | NM_021571 | -     | -     |
| IL10    | Interleukin 10                                                                 | NM_000572 | -     | -     |
| IL10RA  | Interleukin 10 receptor, alpha                                                 | NM_001558 | -     | -     |
| IL10RB  | Interleukin 10 receptor, beta                                                  | NM_000628 | -     | 1.49  |
| IL13    | Interleukin 13                                                                 | NM_002188 | -     | -     |
| IL13RA1 | Interleukin 13 receptor, alpha 1                                               | NM_001560 | -     | -     |
| IL17C   | Interleukin 17C                                                                | NM_013278 | -     | -     |
| IL1A    | Interleukin 1, alpha                                                           | NM_000575 | -     | -     |
| IL1B    | Interleukin 1, beta                                                            | NM_000576 | 1.95  | -     |

|        |                                                                                               |           |       |       |
|--------|-----------------------------------------------------------------------------------------------|-----------|-------|-------|
| IL1F10 | Interleukin 1 family, member 10 (theta)                                                       | NM_173161 | -     | -     |
| IL1F5  | Interleukin 1 family, member 5 (delta)                                                        | NM_012275 | -     | -     |
| IL1F6  | Interleukin 1 family, member 6 (epsilon)                                                      | NM_014440 | -     | -     |
| IL1F7  | Interleukin 1 family, member 7 (zeta)                                                         | NM_173205 | -1.54 | 5.19  |
| IL1F8  | Interleukin 1 family, member 8 (eta)                                                          | NM_173178 | -     | -     |
| IL1F9  | Interleukin 1 family, member 9                                                                | NM_019618 | -     | -     |
| IL1R1  | Interleukin 1 receptor, type I                                                                | NM_000877 | -1.48 | -     |
| IL1RN  | Interleukin 1 receptor antagonist                                                             | NM_000577 | -1.59 | -     |
| IL22   | Interleukin 22                                                                                | NM_020525 | -     | -     |
| IL5    | Interleukin 5 (colony-stimulating factor, eosinophil)                                         | NM_000879 | 1.51  | -     |
| IL5RA  | Interleukin 5 receptor, alpha                                                                 | NM_000564 | -     | -     |
| IL8    | Interleukin 8                                                                                 | NM_000584 | -     | -     |
| IL8RA  | Interleukin 8 receptor, alpha                                                                 | NM_000634 | -     | -     |
| IL8RB  | Interleukin 8 receptor, beta                                                                  | NM_001557 | -1.61 | -     |
| IL9    | Interleukin 9                                                                                 | NM_000590 | -     | -     |
| IL9R   | Interleukin 9 receptor                                                                        | NM_002186 | 4.07  | -     |
| LTA    | Lymphotoxin alpha (TNF superfamily, member 1)                                                 | NM_000595 | -1.54 | 1.97  |
| LTB    | Lymphotoxin beta (TNF superfamily, member 3)                                                  | NM_002341 | -     | 36.13 |
| LTB4R  | Leukotriene B4 receptor                                                                       | NM_181657 | -     | -     |
| MIF    | Macrophage migration inhibitory factor (glycosylation-inhibiting factor)                      | NM_002415 | -     | -     |
| SCYE1  | Small inducible cytokine subfamily E, member 1 (endothelial monocyte-activating)              | NM_004757 | -     | -     |
| SPP1   | Secreted phosphoprotein 1 (osteopontin, bone sialoprotein I, early T-lymphocyte activation 1) | NM_000582 | -     | -     |
| TNF    | Tumor necrosis factor (TNF superfamily, member 2)                                             | NM_000594 | -     | -     |
| CD40LG | CD40 ligand (TNF superfamily, member 5, hyper-IgM syndrome)                                   | NM_000074 | -     | -     |
| TOLLIP | Toll interacting protein                                                                      | NM_019009 | -     | -     |
| XCR1   | Chemokine (C motif) receptor 1                                                                | NM_005283 | -     | -     |
| AKT1   | V-akt murine thymoma viral oncogene homolog 1                                                 | NM_005163 | -     | -     |
| ANGPT1 | Angiopoietin 1                                                                                | NM_001146 | -     | 1.97  |
| ANGPT2 | Angiopoietin 2                                                                                | NM_001147 | -     | -     |

|         |                                                                                                              |              |          |      |
|---------|--------------------------------------------------------------------------------------------------------------|--------------|----------|------|
| ANGPTL3 | Angiopoietin-like 3                                                                                          | NM_014495    | -23.30   | -    |
| ANGPTL4 | Angiopoietin-like 4                                                                                          | NM_001039667 | 1.70     | 1.60 |
| ANPEP   | Alanyl (membrane) aminopeptidase (aminopeptidase N, aminopeptidase M, microsomal aminopeptidase, CD13, p150) | NM_001150    | -        | 1.97 |
| BAI1    | Brain-specific angiogenesis inhibitor 1                                                                      | NM_001702    | 1.52     | -    |
| CDH5    | Cadherin 5, type 2, VE-cadherin (vascular epithelium)                                                        | NM_001795    | -        | 1.71 |
| COL18A1 | Collagen, type XVIII, alpha 1                                                                                | NM_030582    | 12485.79 | 1.49 |
| COL4A3  | Collagen, type IV, alpha 3 (Goodpasture antigen)                                                             | NM_000091    | -        | 2.11 |
| ECGF1   | Endothelial cell growth factor 1 (platelet-derived)                                                          | NM_001953    | -        | 1.97 |
| EDG1    | Endothelial differentiation, sphingolipid G-protein-coupled receptor, 1                                      | NM_001400    | -        | -    |
| EFNA1   | Ephrin-A1                                                                                                    | NM_182685    | -        | 1.97 |
| EFNA3   | Ephrin-A3                                                                                                    | NM_004952    | -        | -    |
| EFNB2   | Ephrin-B2                                                                                                    | NM_004093    | -        | 1.83 |
| EGF     | Epidermal growth factor (beta-urogastrone)                                                                   | NM_001963    | 3.20     | 1.49 |
| ENG     | Endoglin (Osler-Rendu-Weber syndrome 1)                                                                      | NM_000118    | 2.96     | -    |
| EPHB4   | EPH receptor B4                                                                                              | NM_004444    | -        | -    |
| EREG    | Epiregulin                                                                                                   | NM_001432    | -        | -    |
| FGF1    | Fibroblast growth factor 1 (acidic)                                                                          | NM_000800    | 2.20     | -    |
| FGF2    | Fibroblast growth factor 2 (basic)                                                                           | NM_002006    | -        | -    |
| FGFR3   | Fibroblast growth factor receptor 3 (achondroplasia, thanatophoric dwarfism)                                 | NM_000142    | -        | 1.83 |
| FIGF    | C-fos induced growth factor (vascular endothelial growth factor D)                                           | NM_004469    | -        | 2.42 |
| FLT1    | Fms-related tyrosine kinase 1 (vascular endothelial growth factor/vascular permeability factor receptor)     | NM_002019    | -        | -    |
| HAND2   | Heart and neural crest derivatives expressed 2                                                               | NM_021973    | -        | 1.71 |
| HGF     | Hepatocyte growth factor (hepapoietin A; scatter factor)                                                     | NM_000601    | -        | -    |
| HIF1A   | Hypoxia-inducible factor 1, alpha subunit (basic helix-loop-helix transcription factor)                      | NM_001530    | -        | 2.11 |
| HPSE    | Heparanase                                                                                                   | NM_006665    | -        | 2.59 |
| ID1     | Inhibitor of DNA binding 1, dominant negative helix-loop-helix protein                                       | NM_002165    | -        | 1.60 |

|        |                                                                                        |           |      |       |
|--------|----------------------------------------------------------------------------------------|-----------|------|-------|
| ID3    | Inhibitor of DNA binding 3, dominant negative helix-loop-helix protein                 | NM_002167 | 2.22 | -     |
| IFNA1  | Interferon, alpha 1                                                                    | NM_024013 | -    | -     |
| IFNA2  | Interferon, alpha 2                                                                    | NM_000605 | -    | -     |
| IFNB1  | Interferon, beta 1, fibroblast                                                         | NM_002176 | 3.13 | -     |
| IFNG   | Interferon, gamma                                                                      | NM_000619 | -    | -     |
| IGF1   | Insulin-like growth factor 1 (somatomedin C)                                           | NM_000618 | -    | 1.60  |
| IL6    | Interleukin 6 (interferon, beta 2)                                                     | NM_000600 | 1.52 | -     |
| ITGAV  | Integrin, alpha V (vitronectin receptor, alpha polypeptide, antigen CD51)              | NM_002210 | -    | 1.60  |
| ITGB3  | Integrin, beta 3 (platelet glycoprotein IIIa, antigen CD61)                            | NM_000212 | -    | -     |
| JAG1   | Jagged 1 (Alagille syndrome)                                                           | NM_000214 | -    | -     |
| KDR    | Kinase insert domain receptor (a type III receptor tyrosine kinase)                    | NM_002253 | 1.75 | 1.60  |
| LAMA5  | Laminin, alpha 5                                                                       | NM_005560 | 1.69 | 2.26  |
| LECT1  | Leukocyte cell derived chemotaxin 1                                                    | NM_007015 | -    | -     |
| LEP    | Leptin (obesity homolog, mouse)                                                        | NM_000230 | -    | -1.90 |
| MDK    | Midkine (neurite growth-promoting factor 2)                                            | NM_002391 | -    | 2.78  |
| MMP2   | Matrix metalloproteinase 2 (gelatinase A, 72kDa gelatinase, 72kDa type IV collagenase) | NM_004530 | 1.40 | 1.40  |
| MMP9   | Matrix metalloproteinase 9 (gelatinase B, 92kDa gelatinase, 92kDa type IV collagenase) | NM_004994 | 2.88 | -     |
| NOTCH4 | Notch homolog 4 (Drosophila)                                                           | NM_004557 | -    | -     |
| NRP1   | Neuropilin 1                                                                           | NM_003873 | -    | 2.42  |
| NRP2   | Neuropilin 2                                                                           | NM_003872 | -    | 1.49  |
| PDGFA  | Platelet-derived growth factor alpha polypeptide                                       | NM_002607 | 1.89 | -     |
| PECAM1 | Platelet/endothelial cell adhesion molecule (CD31 antigen)                             | NM_000442 | 1.55 | -     |
| PF4    | Platelet factor 4 (chemokine (C-X-C motif) ligand 4)                                   | NM_002619 | -    | 1.83  |
| PIGF   | Placental growth factor, vascular endothelial growth factor-related protein            | NM_002632 | -    | 2.11  |
| PLAU   | Plasminogen activator, urokinase                                                       | NM_002658 | -    | -     |
| PLG    | Plasminogen                                                                            | NM_000301 | -    | -     |

|          |                                                                                                              |           |      |      |
|----------|--------------------------------------------------------------------------------------------------------------|-----------|------|------|
| PLXDC1   | Plexin domain containing 1                                                                                   | NM_020405 | -    | 2.11 |
| PROK2    | Prokineticin 2                                                                                               | NM_021935 | -    | -    |
| PTGS1    | Prostaglandin-endoperoxide synthase 1<br>(prostaglandin G/H synthase and cyclooxygenase)                     | NM_000962 | -    | 2.26 |
| SERPINF1 | Serpin peptidase inhibitor, clade F (alpha-2<br>antiplasmin, pigment epithelium derived factor),<br>member 1 | NM_002615 | -    | -    |
| SPHK1    | Sphingosine kinase 1                                                                                         | NM_021972 | -    | -    |
| STAB1    | Stabilin 1                                                                                                   | NM_015136 | -    | 2.78 |
| TEK      | TEK tyrosine kinase, endothelial (venous<br>malformations, multiple cutaneous and mucosal)                   | NM_000459 | -    | -    |
| TGFA     | Transforming growth factor, alpha                                                                            | NM_003236 | -    | 1.83 |
| TGFB1    | Transforming growth factor, beta 1                                                                           | NM_000660 | 1.45 | 2.42 |
| TGFB2    | Transforming growth factor, beta 2                                                                           | NM_003238 | -    | 1.83 |
| TGFBR1   | Transforming growth factor, beta receptor I (activin<br>A receptor type II-like kinase, 53kDa)               | NM_004612 | -    | -    |
| THBS1    | Thrombospondin 1                                                                                             | NM_003246 | -    | 1.49 |
| THBS2    | Thrombospondin 2                                                                                             | NM_003247 | -    | -    |
| TIMP1    | TIMP metalloproteinase inhibitor 1                                                                           | NM_003254 | 1.46 | 2.26 |
| TIMP2    | TIMP metalloproteinase inhibitor 2                                                                           | NM_003255 | -    | 2.26 |
| TIMP3    | TIMP metalloproteinase inhibitor 3 (Sorsby fundus<br>dystrophy, pseudoinflammatory)                          | NM_000362 | -    | 1.60 |
| TNF      | Tumor necrosis factor (TNF superfamily, member<br>2)                                                         | NM_000594 | -    | 1.97 |
| TNFAIP2  | Tumor necrosis factor, alpha-induced protein 2                                                               | NM_006291 | -    | 1.97 |
| VEGFA    | Vascular endothelial growth factor A                                                                         | NM_003376 | -    | 2.26 |
| VEGFC    | Vascular endothelial growth factor C                                                                         | NM_005429 | 1.60 | -    |

“-“ denotes no change in gene expression
